# Supplementary material for: Trends in COVID-19 Vaccine Intentions during the COVID-19 Pandemic; a Systematic Review and Meta-Analysis of Cross-Sectional Studies
Source: Research Square preprint supplement (doi:10.21203/rs.3.rs-870761/v1), 2021-09-17
Supplement: Supplementary file 1 [file 7f63619650a72898936598dd.docx]

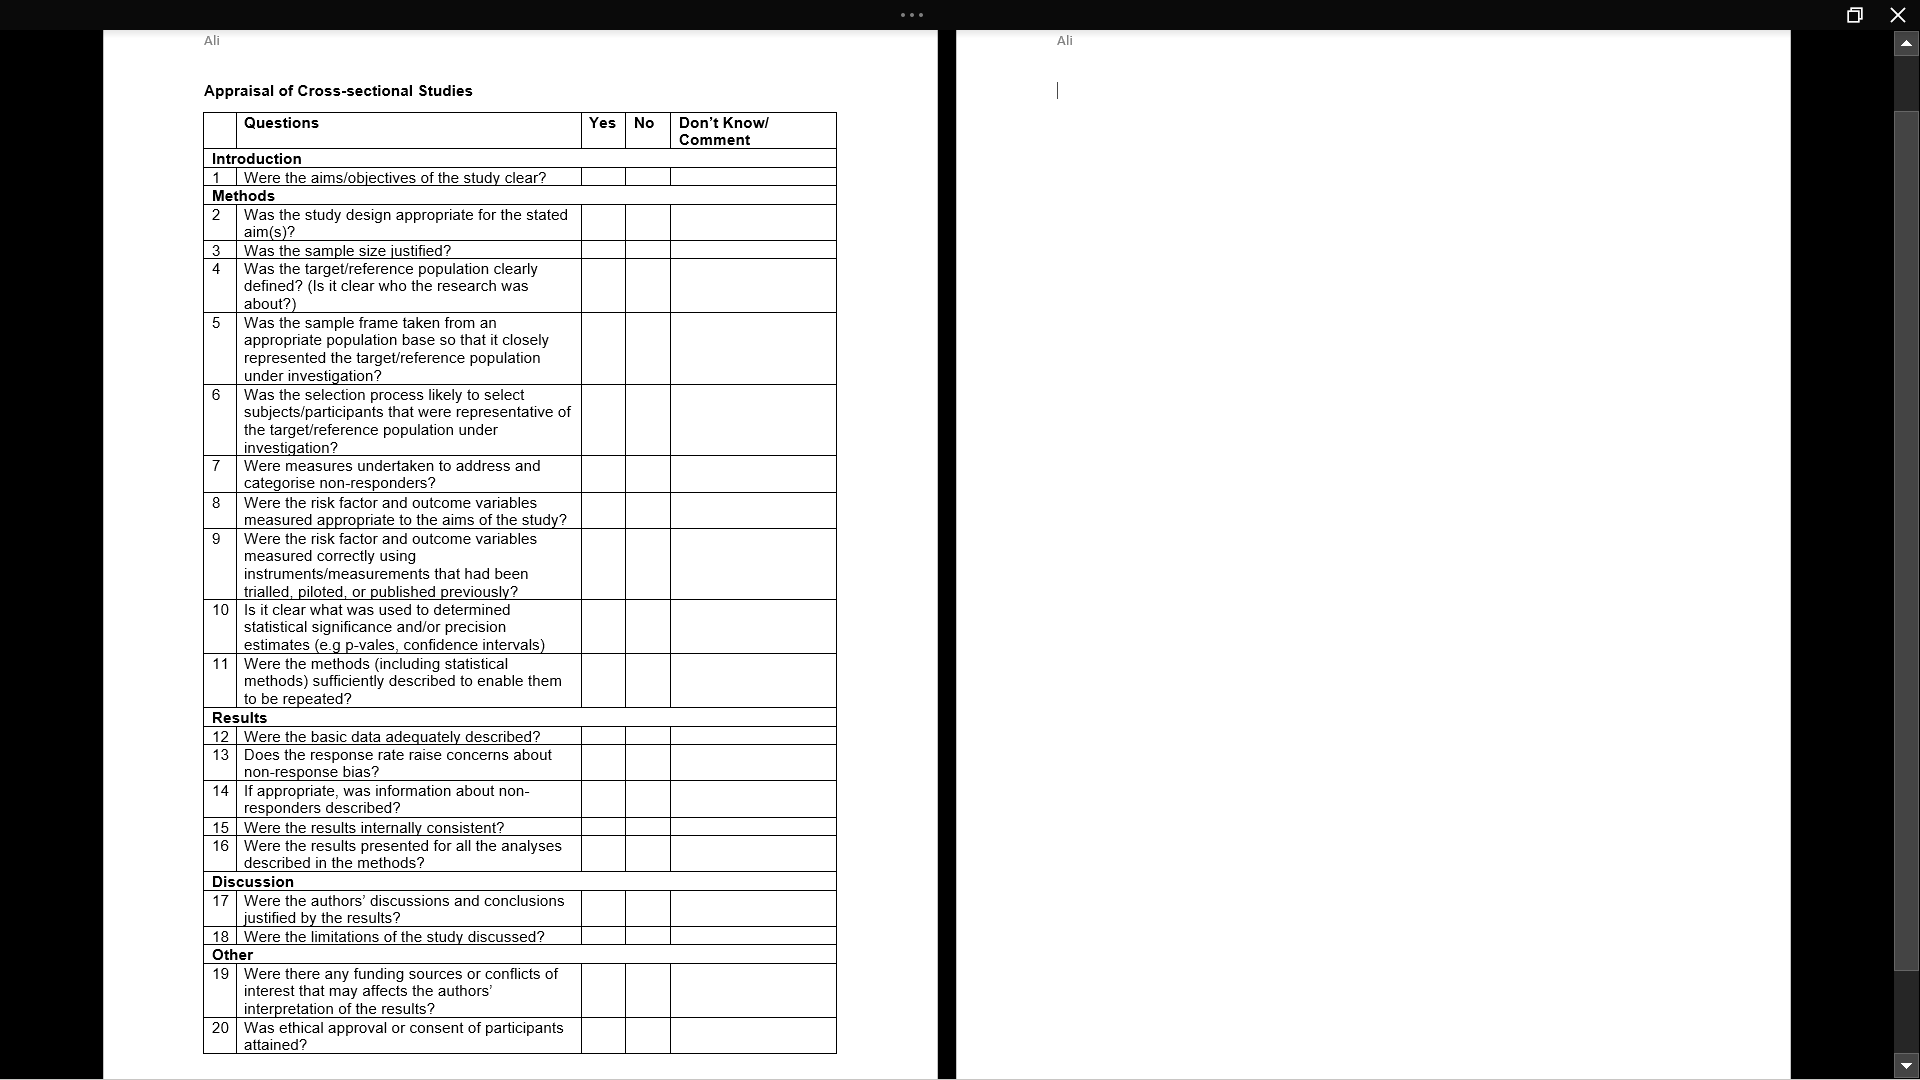
**Additional File 5: AXIS Form.** A copy of the AXIS form used for the assessment of bias and quality of each study included in the review.
