# Supplementary material for: Trends in COVID-19 Vaccine Intentions during the COVID-19 Pandemic; a Systematic Review and Meta-Analysis of Cross-Sectional Studies
Source: Research Square preprint supplement (doi:10.21203/rs.3.rs-870761/v1), 2021-09-17
Supplement: Supplementary file 2 [file ec85eff474d4297aa1e846e8.docx]

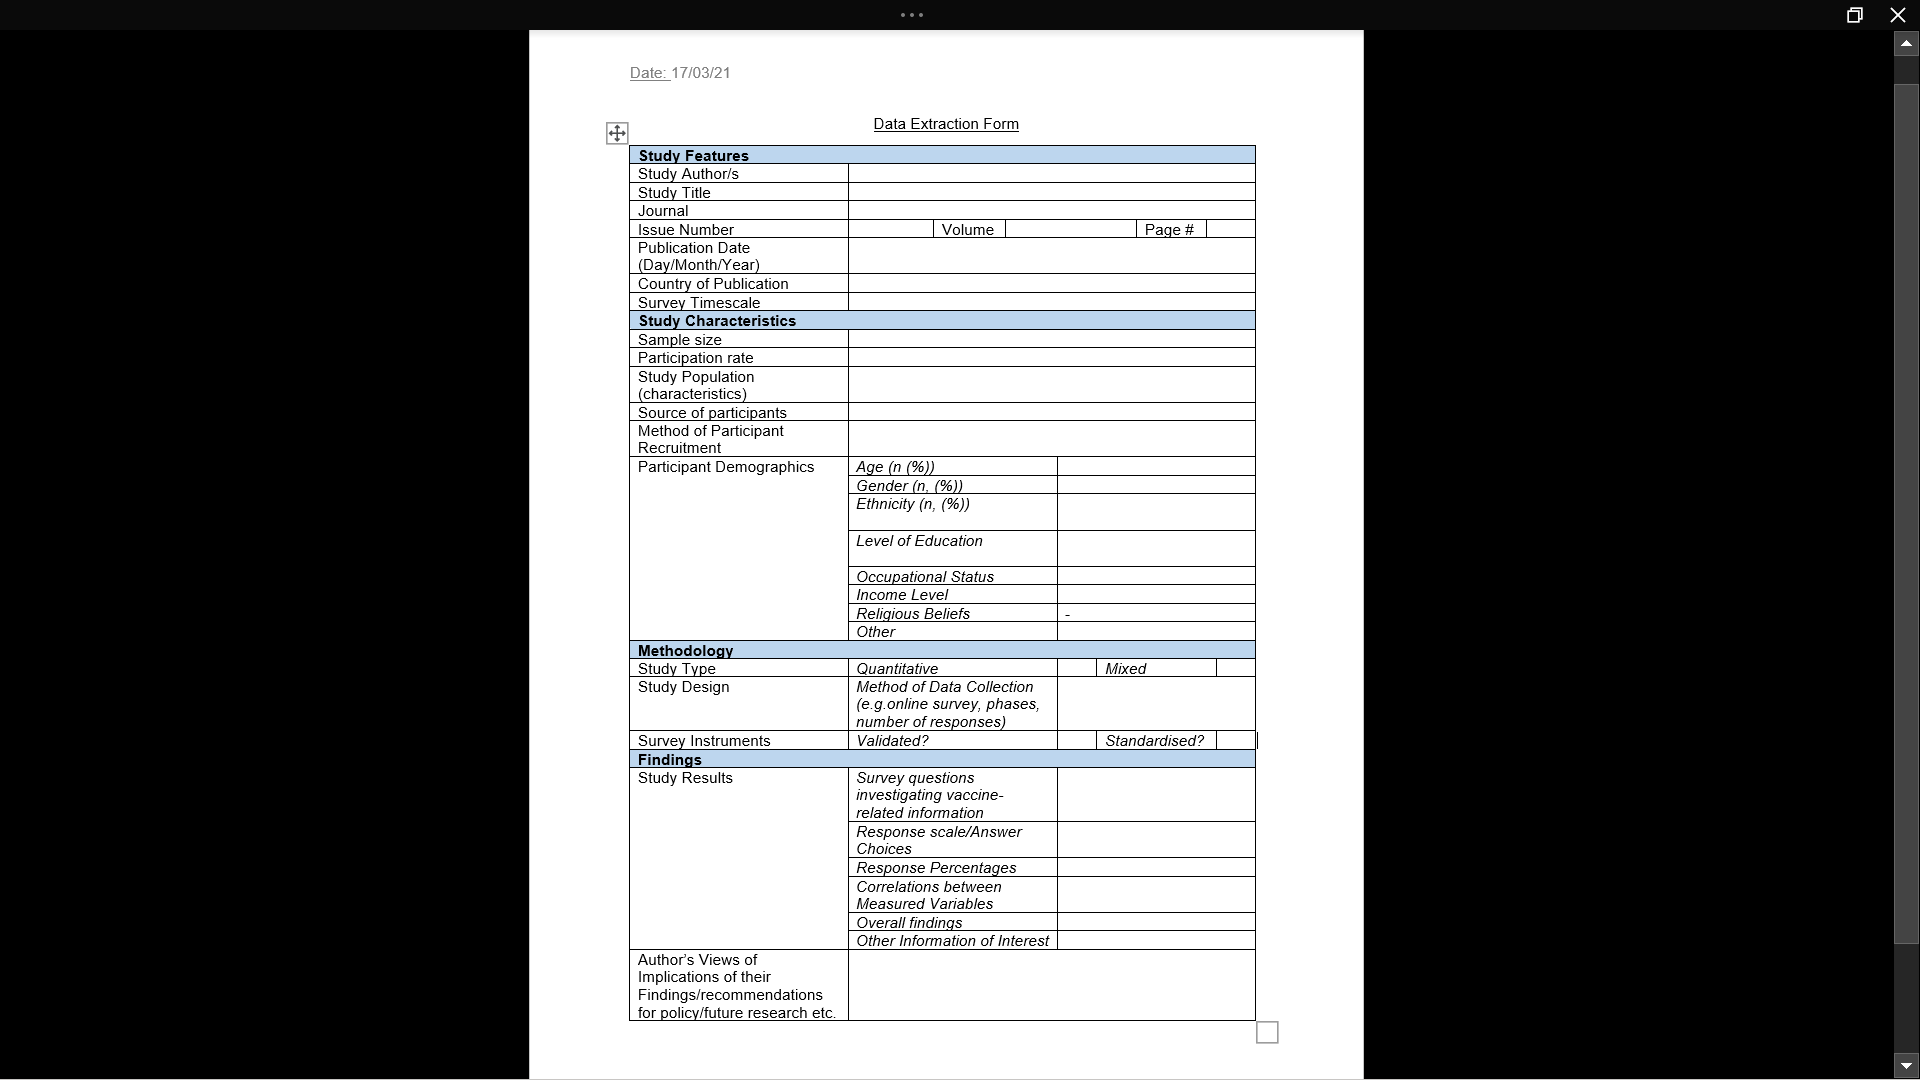
**Additional File 4: Data Extraction Form.** A copy of the data extraction form used to extract data from each study included in the review.
